# Supplementary material
Source: publisher figshare collection journal article supplement (https://acs.figshare.com/ndownloader/files/5075752)
Supplement: Supplementary file 1 [file 5075752]

# Multiple wurtzite twinning in CdTe nanocrystals induced by methylphosphonic acid

*Luigi Carbone<sup>a</sup>, Stefan Kudera<sup>b</sup>, Elvio Carlino<sup>c</sup>, Wolfgang J. Parak<sup>b</sup>, Cinzia Giannini,<sup>d</sup> Roberto  
Cingolani<sup>a</sup> and Liberato Manna<sup>a\*</sup>*

<sup>a</sup> National Nanotechnology Laboratory of CNR-INFM, 73100 Lecce, Italy

<sup>b</sup> Center for Nanoscience, Ludwig Maximilians Universität, München, Germany

<sup>c</sup> TASC-INFM-CNR National Laboratory, Area Science Park - Basovizza, 34012 Trieste, Italy

<sup>d</sup> CNR-Istituto di Cristallografia (IC), via Amendola 122/O, 70126 Bari, Italy

## Supporting Information

[liberato.manna@unile.it](mailto:liberato.manna@unile.it)

**RECEIVED DATE** (to be automatically inserted after your manuscript is accepted if  
required according to the journal that you are submitting your paper to)

\*Corresponding author:

liberato.manna@unile.it; tel. +39 0832 298 207; fax +39 0832 298 238

### **Impurities in old batches of Octadecylphosphonic acid**

The impurities previously present in ODPa, as declared by the vendor (Polycarbon Industries Inc.), were the following: ethyl phosphonic acid, ethyl esters of ethyl phosphonic acid (mono and di-esters), octadecyl esters of ethyl phosphonic acid (mono and di-esters), mixed esters of the above, ethyl esters of ODPa (mono and di-esters), octadecyl esters of ODPa (mono and di-esters), mixed esters of the above. It is likely that other vendors provided ODPa with similar impurities in the past.

## Diffraction Data

**Figure S1.** We report here the XRD spectra of the samples shown in Figure 2a, 2d and 2f of the manuscript. These samples are prepared at the following MPA:OPDA ratios: (a) 0.026; (d) 0.081; (f) 0.111. At the bottom of the plot, on the x-axis, the red lines correspond to the positions of the peaks in bulk wurtzite CdTe, while the blue lines correspond to the positions of the peaks in bulk sphalerite CdTe. On the top of the plot, these diffraction peaks are indexed.

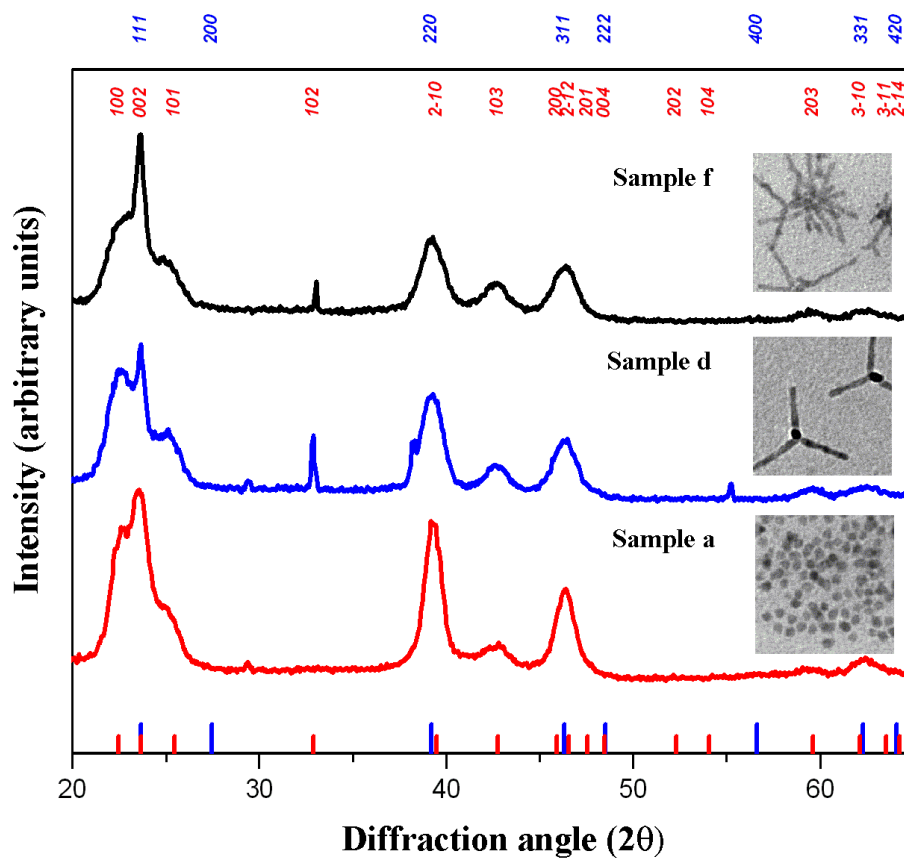

### Model of a multiple wurtzite twinned nanocrystal (a dipod) viewed at different tilts

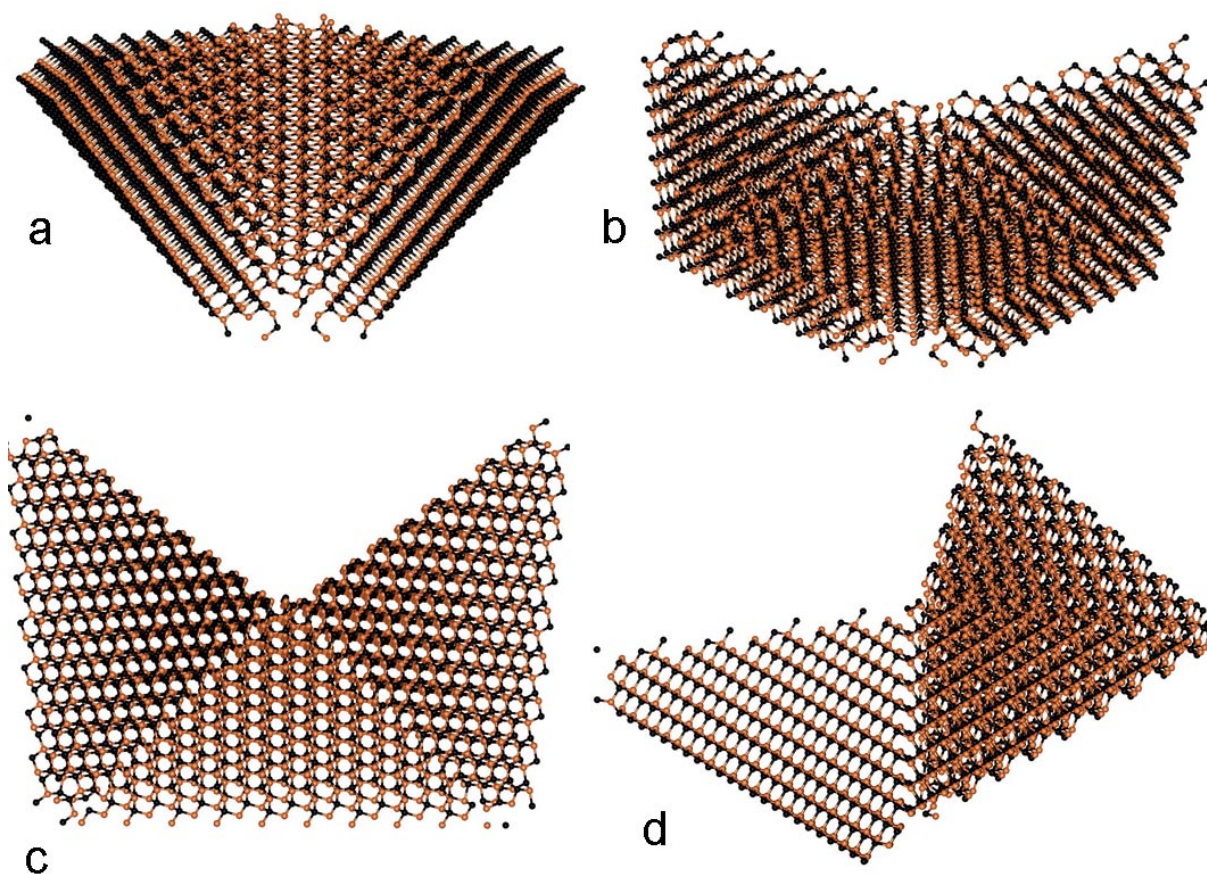

**Figure S2.** Different views of a dipod based on a multiple wurtzite twinned nanocrystal (the one used for the HRTEM image simulation, see figure 6 of the manuscript). The images have the purpose to show that the unambiguous identification of a given type of twin plane is difficult to achieve, unless the crystal has a particularly favourable orientation. This favourable orientation is for instance the one depicted in Figure S2-d. In this case, the domain on the left and the central domain are both viewed along their  $(10\bar{1}0)$  zone axes (the same as in figure 1d of the manuscript). Unfortunately, the central domain overlaps with the domain on the right and this makes the view less clear. Moreover, this orientation is rather difficult to achieve in a real TEM experiment, as the domain on the right should be pointing upwards (or downwards), while the domain on the left should lie flat. The atomic positions near the twin boundaries have not been relaxed, as opposed to

the case depicted in figures S3 and S4. As a consequence, some stretched or compressed bonds are present in the model (See also the structure file of the dipod included as supporting material).

### Geometrical details of the LDA-DFT computations

We report here the geometrical parameters of the *orthorhombic* supercell used to model the  $1\bar{1}22$  twin boundary, along with the atomic positions in the cell. The supercell used to model the twin boundary contained 64 atoms (for a total of 576 valence electrons) and was adapted from the supercell used by Yan and coworkers to model the same type of defect in ZnO. If we indicate with  $a$  and  $b$  the lattice parameters for the hexagonal cell of bulk wurtzite CdTe, the lattice parameters for the supercell are calculated as follows:

$$\begin{aligned} l_1 &= 8a \cdot \cos(\arctan(a/c)) \\ l_2 &= a/\sin(\arctan(a/c)) \\ l_3 &= 2a \cdot \cos(\pi/6) \end{aligned}$$

As can be seen from Figures S3 and S4, each cell intersects two twin planes. Therefore, the twin plane formation energy is calculated as follows:

$$E_{\text{boundary}} = (E_{\text{supercell}} - E_{\text{bulk}})/2A$$

Here,  $E_{\text{bulk}}$  corresponds to the energy per unit cell of bulk wurtzite CdTe, and  $A$  is the twin plane area intersected by a single supercell, which corresponds to  $l_2 \cdot l_3$ .

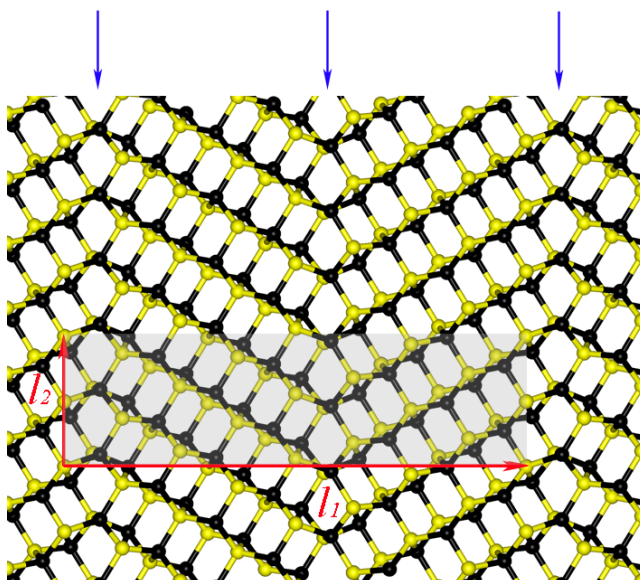

**Figure S3.** Lattice used to model the  $11\bar{2}2$  twin boundary, side view. The shaded area corresponds to a single supercell. It contains 64 atoms (32 Cd and 32 Te). The blue arrows indicate the positions of the twin planes in the lattice.

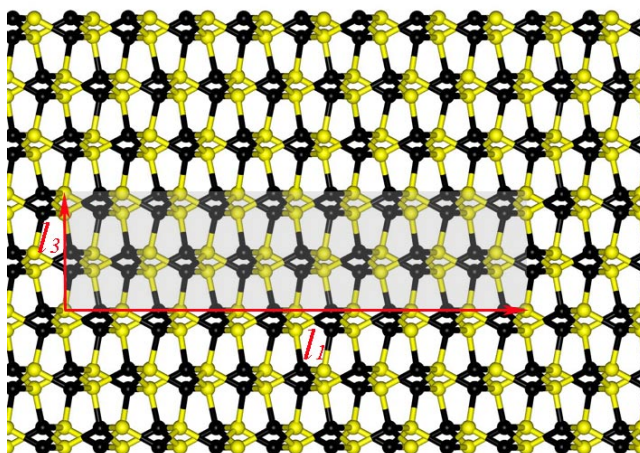

**Figure S4.** Lattice used to model the  $11\bar{2}2$  twin boundary, top view. The shaded area corresponds to a single supercell.

Cell parameters:  $l_1= 31,167 \text{ \AA}$   
 $l_2= 8,777 \text{ \AA}$   
 $l_3= 7,897 \text{ \AA}$

Atomic positions in the cell (along  $l_1$ ,  $l_2$ , and  $l_3$ , respectively):

|    |             |             |             |
|----|-------------|-------------|-------------|
| Te | 0.484792276 | 0.633448318 | 0.324374777 |
| Te | 0.233392040 | 0.604490987 | 0.166535178 |
| Te | 0.733472620 | 0.515843578 | 0.166811465 |
| Te | 0.608373364 | 0.797662140 | 0.165787235 |
| Te | 0.233379049 | 0.104510736 | 0.333489332 |
| Te | 0.173644375 | 0.468289588 | 0.666978980 |
| Te | 0.858289392 | 0.240028713 | 0.169650262 |
| Te | 0.985103391 | 0.481757787 | 0.323249028 |
| Te | 0.298257572 | 0.746371744 | 0.666868506 |
| Te | 0.357990061 | 0.880996596 | 0.169781022 |
| Te | 0.484790563 | 0.133538251 | 0.175475216 |
| Te | 0.985108023 | 0.981646755 | 0.176654796 |
| Te | 0.923687838 | 0.089965769 | 0.665745972 |
| Te | 0.108712461 | 0.316856571 | 0.165816202 |
| Te | 0.423143530 | 0.029659331 | 0.664457596 |
| Te | 0.048567065 | 0.213537898 | 0.663091435 |
| Te | 0.673477765 | 0.648150368 | 0.666419799 |
| Te | 0.798451074 | 0.372105969 | 0.666741280 |
| Te | 0.858281818 | 0.740041814 | 0.330316217 |
| Te | 0.923696982 | 0.589943934 | 0.834213598 |
| Te | 0.733463989 | 0.015816978 | 0.333195193 |
| Te | 0.548306016 | 0.401534209 | 0.837154643 |
| Te | 0.423155068 | 0.529593575 | 0.835656800 |
| Te | 0.673470407 | 0.148162723 | 0.833614020 |
| Te | 0.798433581 | 0.872113709 | 0.833210129 |
| Te | 0.608375126 | 0.297563898 | 0.334124197 |
| Te | 0.298266182 | 0.246378969 | 0.833223467 |
| Te | 0.548316701 | 0.901520767 | 0.662924548 |
| Te | 0.357988170 | 0.380999617 | 0.330297088 |
| Te | 0.048557743 | 0.713554190 | 0.836929973 |
| Te | 0.173628787 | 0.968322287 | 0.833040397 |
| Te | 0.108698262 | 0.816892118 | 0.334182017 |
| Cd | 0.686618827 | 0.243985207 | 0.167595774 |
| Cd | 0.436411445 | 0.410196024 | 0.165305761 |
| Cd | 0.626940885 | 0.376372416 | 0.669010243 |
| Cd | 0.876104177 | 0.818334074 | 0.664720095 |
| Cd | 0.561195117 | 0.525452266 | 0.164364859 |
| Cd | 0.311289989 | 0.653441076 | 0.332069133 |
| Cd | 0.811383223 | 0.967764761 | 0.167411188 |
| Cd | 0.311295934 | 0.153412033 | 0.168008686 |
| Cd | 0.186642217 | 0.876791973 | 0.168241434 |
| Cd | 0.251591100 | 0.018322254 | 0.666437799 |
| Cd | 0.000573802 | 0.493013763 | 0.669020638 |
| Cd | 0.811375055 | 0.467741180 | 0.332571203 |
| Cd | 0.936381515 | 0.705155239 | 0.165893797 |
| Cd | 0.375930490 | 0.302332568 | 0.664695957 |
| Cd | 0.061515589 | 0.588568611 | 0.163542439 |
| Cd | 0.127095141 | 0.239595986 | 0.830498095 |
| Cd | 0.436356734 | 0.910155787 | 0.334713877 |
| Cd | 0.561189496 | 0.025562910 | 0.335637689 |
| Cd | 0.375940155 | 0.802281292 | 0.835506562 |
| Cd | 0.000544187 | 0.992992967 | 0.831080659 |
| Cd | 0.876120646 | 0.318287959 | 0.835262600 |
| Cd | 0.061511231 | 0.088560233 | 0.336334779 |
| Cd | 0.686605102 | 0.743942927 | 0.332367216 |
| Cd | 0.751510776 | 0.100169144 | 0.667013214 |
| Cd | 0.936379525 | 0.205231275 | 0.334049430 |
| Cd | 0.751512256 | 0.600128771 | 0.832996492 |
| Cd | 0.186638706 | 0.376619323 | 0.331688504 |
| Cd | 0.626923189 | 0.876364310 | 0.830986891 |
| Cd | 0.251598903 | 0.518360155 | 0.833592253 |
| Cd | 0.500329278 | 0.122571993 | 0.830104151 |
| Cd | 0.500325435 | 0.622319394 | 0.670091488 |
| Cd | 0.127091959 | 0.739548454 | 0.669596226 |
